# Supplementary material for: Global ocean CO2 uptake dominated by the ENSO in the last thirty years
Source: Research Square preprint supplement (doi:10.21203/rs.3.rs-2021081/v1), 2022-09-12
Supplement: Supplementary file 1 [file 6003f143f0357e71a5fc4dac.docx]

*Supplement of*

**Global ocean CO2 uptake dominated by the ENSO in the last thirty years**

**Guorong Zhong et al.**

Correspondence to: Xuegang Li (lixuegang@qdio.ac.cn); Jinming Song ([jmsong@qdio.ac.cn](mailto:jmsong@qdio.ac.cn))

**S1 Updated *p*CO2 predictors in each biogeochemical province based on Stepwise FFNN algorithm**

Compared with the first version of the Stepwise FFNN algorithm (Zhong et al., 2022), now we used the average outputs of serval networks as the final *p*CO2 prediction value to remove the influence of random assigned initial state of FFNN and the training data sort order. Thus, the *p*CO2 predictors in each province (Figure S1) was partly changed due to the updated algorithm (Table S1).

Figure S1. Biogeochemical provinces. Adapted from Zhong et al. (2022).

Table S1. Updated *p*CO2 predictors in each biogeochemical province.

| Province | Predictors in the order of the stepwise FFNN algorithm output |
| --- | --- |
| P1 Arctic Ocean | Nitrateclim, sLat, Silicateclim, SST, xCO2, month, SSS, Bathymetry, Wvel(65m), Wind speed, SSH, Wvel(5m) |
| P2 subpolar Pacific a* | Nitrateclim, TAclim, Chl-a, Year, cLon, SST, log10(MLD), sLon, sLat, SSS, DOclim, SSTanom, Bathymetry, Wvel(195m), DICclim, log10(MLD)anom |
| P2 subpolar Pacific b* | Nitrateclim, Nmon, SST, sLon, Bathymetry, SSS, log10(MLD), sLat, DOclim, cLon, log10(MLD)anom, SSTanom, SSHanom, SSH, Wvel(195m) |
| P3north subtropical Pacific a | log10(MLD), sLat, sLon, Nmon, SST, SSS, Chl-a, Wind speed, xCO2, log10(MLD)anom, Bathymetry, TAclim, SSHanom, SSH, cLon, Silicateclim, SSSanom, Nitrateclim, Wvel(105m) |
| P3 north subtropical Pacific b | log10(MLD), Nmon, sLat, sLon, SST, SSS, cLon, log10(MLD)anom, TAclim, Wind speed, SSHanom, SSH, xCO2, Bathymetry, DOclim, Phosphateclim, Wvel(5m), Silicateclim, Wvel(105m), DICclim |
| P4subpolar Atlantic a | Chl-a, sLat, sLon, xCO2, SST, TAclim, log10(MLD), Bathymetry, cLon, Phosphateclim, DOclim, Wind speed, Wvel(195m), log10(MLD)clim |
| P4 subpolar Atlantic b | Nitrate, DOclim, xCO2, Wind speed, sLon, SST, sLat, Bathymetry, TAclim, log10(MLD), cLon, log10(MLD)clim, DICclim, Silicateclim |
| P5 north subtropical Atlantic a | SST, Nmon, month, sLat, SSS, Chl-a, Wind speed, cLon, Phosphateclim, Silicateclim, log10(MLD)anom, Nitrateclim, Wvel(5m), Chl-aanom |
| P5 north subtropical Atlantic b | SST, Nmon, month, sLat, SSS, cLon, Wind speed, Bathymetry, DICclim  Phosphateclim, Silicateclim, log10(MLD)anom, Nitrateclim, Wvel(5m), Chl-aanom |
| P6 south Pacific a | SST, sLat, xCO2, sLon, SSS, month, Chl-a, SSH, DICclim, Bathymetry, Wind speed, SSTanom, Nitrateclim, Chl-aanom |
| P6 south Pacific b | SST, xCO2, sLat, SSS, sLon, month, DICclim, log10(MLD), SSH, Nitrateclim, xCO2 anom, TAclim |
| P7a equatorial Pacific | Nitrateclim, SSS, sLat, SST, xCO2, Chl-a, log10(MLD), Bathymetry, Chl-aanom, TAclim, DICclim, SSSanom, Silicateclim, Surface pressure |
| P7b equatorial Pacific | Nitrateclim, SSS, xCO2, TAclim, log10(MLD), SST, sLat, Bathymetry, DICclim, Silicateclim, SSSanom |
| P8 south Atlantic a | sLat, log10(MLD), xCO2, SSS, Chl-a, SST, cLon, TAclim, Bathymetry, Chl-aanom, Silicateclim |
| P8 south Atlantic b | sLat, xCO2, DICclim, SST, cLon, SSS, Bathymetry, TAclim, Phosphateclim, SSH, Silicateclim, log10(MLD) |
| P9 Indian Ocean | SST, xCO2, SSHanom, log10(MLD), Nitrateclim, sLon, Wvel(105m), Wvel(195m), Wvel(65m), DICclim, log10(MLD)anom, Bathymetry |
| P10 subpolar Southern Ocean a | Chl-a, SSS, log10(MLD), xCO2, Wvel(105m), Bathymetry, SST, log10(MLD)anom, Wvel(195m), Chl-aanom, Wvel(65m), DOclim |
| P10 subpolar Southern Ocean b | DICclim, DOclim, SSS, xCO2, Bathymetry, Wvel(195m), Wvel(65m), Wind speed, Wvel(105m) |
| P11 Southern Ocean ice a | Chl-a, SSS, sLat, DICclim, SSH, Bathymetry, Wvel(65m), DOclim, Chl-aanom, Wvel(105m), Wvel(195m), Nitrateclim |
| P11 Southern Ocean ice b | sLat, DICclim, Bathymetry, SSSanom, SSS, Nitrateclim, Wvel(65m), Wvel(195m), DOclim, Wvel(105m) |
| *: Due to insufficient coverage of Chl-a data in the polar areas and during the period before 2002, in provinces that Chl-a or Chl-a anom were selected as predictors, the *p*CO2 data was divided into two periods. The period with Chl-a data available was represented by the subscript ‘a’, such as P2a, including global grids from 2002 to 2020 except polar grids in winter. The period with Chl-a data unavailable was represented by the subscript ‘b’, such as P2b, including global grids from 1992 to 2001 and some polar grids in winter from 1992 to 2020. For the full name of all predictor and the used product, see Table 1 of Zhong et al. (2022). | |

**Reference:**

Zhong, G., Li, X., Song, J., Qu, B., Wang, F., Wang, Y., Zhang, B., Sun, X., Zhang, W., Wang, Z., Ma, J., Yuan, H., and Duan, L.: Reconstruction of global surface ocean *p*CO2 using region-specific predictors based on a stepwise FFNN regression algorithm, Biogeosciences, 19, 845–859, https://doi.org/10.5194/bg-19-845-2022, 2022.
